# Supplementary material for: Rapid and facile detection of HBV with CRISPR/Cas13a
Source: Royal Society of Chemistry journal article supplement (doi:10.1039/d2nj02674k), 2022-01-01
Supplement: d2nj02674k1.pdf [file d2nj02674k1.pdf]

## Supplementary information

**Figure S1 Interpretation of HBV Cas13a-SHERLOCK lateral flow results**

| Result   | Schematic | Example | Interpretation                                                                                                                                                                                                                                                                                                                                                                                                                      |
|----------|-----------|---------|-------------------------------------------------------------------------------------------------------------------------------------------------------------------------------------------------------------------------------------------------------------------------------------------------------------------------------------------------------------------------------------------------------------------------------------|
| Negative |           |         | Negative strips show no signal at the test line. Previous research has shown that negative strips left at room temperature for more than 10 minutes may show a fainter signal than a real positive signal at the test line. Because the lateral flow test strip technique in our study required 30 minutes of incubation in a metal bath at 37 °C before the test, a weak signal may be noticed on test lines with negative strips. |
| Positive |           |         | A signal will be present at the test line for a strip that displays a positive result. The control line may or may not also exhibit a signal, depending on the degree of collateral cleavage of reporter molecules. When the reporter molecule is entirely cleaved, the control line will not display a signal.                                                                                                                     |

**Figure S2 ROC curve of Cas13a-SHERLOCK assay**

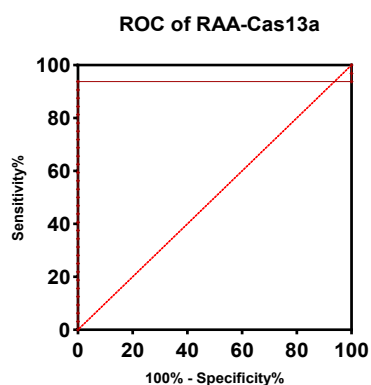

**Table S1. Sequences involved in this study**

HBV standard plasmid synthesis

| Name          | Sequence (5'-3')                                                                                  |
|---------------|---------------------------------------------------------------------------------------------------|
| Target dsDNA  | GGAAGTTGGGGTACTTTACCACAGGAACATATTGTACACAAAATCAAG                                                  |
| HBV           | CAATGTTTTTCGAAAATTGCCTGTAAATAGACCTATTGATTGGAAAGTAT                                                |
| polymerase    | GTCAAAGAATTGTGGGTCTTTTGGGTTTTGCTGCCCTTTTACACAATGT                                                 |
| coding region | GGATATCCTGCTTTGCTGCCTTATATGCATGTATAACAATCCAAGCAGG                                                 |
| (MN683731)    | CTTTC <u>ACTTTCTCGCCAACTTACAAGGCCTTCTGTGTAAACAATATCTG</u>                                         |
| genotype: C/D | AACCTTTACCCCGTTGCCCGCAACGGTCAGGTCTCTGCCAAGTGTTG                                                   |
| recombinant   | CTGACGCAACCCCCACTGGATGGGGCTTGGCCATAGGCCATCGGCGCA<br>TGCGTGGAACCTTTGTGGCTCCTCTGCCGATCCATACTGCGGAAC |

The standard plasmid was cloned from the above sequence into the PUC57 vector plasmid, which was manufactured by Sangon Biotech (Shanghai).

crRNAs

|                 |                                                                                               |
|-----------------|-----------------------------------------------------------------------------------------------|
| crRNA1          | GAAAUUAAUACGACUCACUAUAGGGGAUUUAGACUACCCCAAAA<br>CGAAGGGGACUAAAACGAAAGGCCUUGUAAGUUGGCGAGAAAGU  |
| crRNA2          | GAAAUUAAUACGACUCACUAUAGGGGAUUUAGACUACCCCAAAA<br>CGAAGGGGACUAAAACGUGGGGUUGCGUCAGCAAACACUUGGC   |
| T7 primer       | GAAATTAATACGACTCACTATAGGG                                                                     |
| Template crRNA1 | ACTTTCTCGCCAACCTTACAAGGCCTTTCGTTTTAGTCCCCTTCGTTTT<br>TGGGGTAGTCTAAATCCCCTATAGTGAGTCGTATTAATTC |
| Template crRNA2 | GCCAAGTGTGCTGACGCAACCCCAACGTTTTAGTCCCCTTCGTTTT<br>TGGGGTAGTCTAAATCCCCTATAGTGAGTCGTATTAATTC    |

#### RAA primers

| Primers | Sequence (5'-3')                                          |
|---------|-----------------------------------------------------------|
| F1      | TAATACGACTCACTATAGGGTGTACAGGCGGGGTTTTCTTGTTGACA           |
| R1      | ATGATAAAACGCCGACACATCCAGCGATA                             |
| F2      | TAATACGACTCACTATAGGGTATTGATTGGAAAGTMTGTCAAMGAATTGTG<br>GG |
| R2      | CCAGTGGGGTTGCGTCAGCAAACACTTGGCA                           |
| F3      | TAATACGACTCACTATAGGGTGAACCTTACCCCGTTGCYCGGCAA             |
| R3      | GCTAGGAGTTCCGCAGTATGGATCGGCAGAGGAG                        |
| F4      | TAATACGACTCACTATAGGGTGCCAAGTGTGCTGACGCAACCCCACTGG         |
| R4      | TACGTCCCGTCGGCGCTGAATCCCGCG                               |
| F5      | TAATACGACTCACTATAGGGTCTTTGTGTACGTCCCGTCGGCGCTGA           |
| R5      | CACGTGCAGAGGTGAAGCGAAGTGCACACGG                           |

#### ssRNA reporter

|                      |                             |
|----------------------|-----------------------------|
| Fluorescent reporter | 5'-6-FAM/UUUUUU/BHO/-3'     |
| Biotin reporter      | 5'-6-FITC/UUUUUU/Biotin/-3' |

### In vitro transcription (IVT) steps of crRNA

#### I Synthesis of double-stranded crRNA

Table S2 First add to the PCR tube according to the system :

| Component               | Volume to add (μL) |
|-------------------------|--------------------|
| crRNA template (100 μM) | 1                  |
| T7 primer (100 μM)      | 1                  |
| RNase-Free Water        | 8                  |
| Total                   | 10                 |

Next, anneal the crRNA template and T7 primers by performing a 10 min denaturation. The reaction was then slowly cooled to 4°C in a PCR thermocycler.

## II T7 transcription of crRNA

Table S3 The above products were mixed in the following system:

| Component                   | Volume to add (μL) |
|-----------------------------|--------------------|
| Annealing reaction          | 10                 |
| NTP buffer mix (20 mM each) | 10                 |
| T7 RNA polymerase mix       | 2                  |
| RNase-Free Water            | 17                 |
| Total                       | 39                 |

The HiScribe™ T7 Quick High Yield RNA Synthesis Kit (NEB, E2050S) was mixed according to the above system and placed in a 37°C incubator for 10 hours.

## III Purification of crRNA

The above T7 transcript product was purified by using Monarch® RNA Cleanup Kit (10 μg) (NEB, T2030L) and following the instructions strictly.

Table S4 Information on purchased reagents

| Name                                            | Company and item number       |
|-------------------------------------------------|-------------------------------|
| LwaCas13a protein (5μM)                         | GUANGZHOU BIO-LIFESCI, M20202 |
| HiScribe™ T7 Quick High Yield RNA Synthesis Kit | NEB, E2050S                   |
| Monarch® RNA Cleanup Kit (10 μg)                | NEB, T2030L                   |
| RNase-Free Water                                | CWBIO, CW0612                 |
| Milenia HybriDetect 1                           | Milenia biotec, MGHD1         |
| RNase Inhibitor, Murine (40000 units/ml)        | NEB, M0314L                   |
| Reporter                                        | Shanghai Sangon Biotech       |
| HBV Nucleic Acid Assay Kit (Prominence HBV DNA) | Sansure Biotech               |
| T7 RNA Polymerase (50000 units/ml)              | NEB, M0251L                   |
| MgCl <sub>2</sub> (1 M)                         | Thermo Fisher, AM9530G        |
| rNTP (25 mM)                                    | NEB, N0466L                   |
| Recombinase-Aid Amplification Kit               | Hangzhou ZC Biotech, S001ZC   |
| HiPure Viral DNA Kits                           | Magen Biotech                 |

Table S5 RAA reaction systems

Recombinase-aided amplification (RAA) is an isothermal nucleic acid rapid amplification technology that varies from RPA in that it employs recombinases derived from bacteria or fungi. Under isothermal conditions (37°C-42°C), the recombinase UvsX and recombinase mediator protein UvsY can bind firmly to the primers, forming an enzyme-DNA complex. Once the primer locates on the homologous sequence, a chain exchange reaction occurs, triggering DNA synthesis and chain extension by the DNA polymerase and exponentially expanding the target region on the template. This method has the merits of ultra-sensitivity, specificity, rapidity, and simplicity.

The RAA reaction system is listed below:

| Component                           | Volume to add ( $\mu\text{L}$ ) |
|-------------------------------------|---------------------------------|
| A buffer (20% polyethylene glycol)  | 41.5                            |
| B buffer (280 mM magnesium acetate) | 2.5                             |
| Forward Primer (10 Mm)              | 2                               |
| Reverse Primer (10 $\mu\text{M}$ )  | 2                               |
| HBV DNA                             | 2                               |
| Total                               | 50                              |

RAA reaction condition is 37°C, after the reaction is finished, store on ice

**Table S6 Reaction system of Cas13a- SHERLOCK**

| Component                                                                  | Volume to add ( $\mu\text{L}$ ) |
|----------------------------------------------------------------------------|---------------------------------|
| RAA amplification product                                                  | 5-10                            |
| 10x reaction buffer                                                        | 2.5                             |
| crRNA (30ng/ $\mu\text{L}$ )                                               | 1                               |
| MgCl <sub>2</sub> (1M)                                                     | 0.25                            |
| rNTP                                                                       | 1.5                             |
| RNase inhibitor (40000 units/ml)                                           | 1                               |
| T7 RNA Polymerase (50000 units/ml)                                         | 1                               |
| Cas13a (1 $\mu\text{M}$ )                                                  | 2                               |
| Fluorescent reporter, 10 $\mu\text{M}$ or biotin reporter, 1 $\mu\text{M}$ | 1                               |
| RNase-Free Water                                                           | Up to 25                        |

The fluorescence assay was performed by mixing the above system and then performing a fluorescence collection assay. However, the lateral flow test strip (Milenia HybriDetect 1, TwistDx) need to be incubated for 30 min at 37°C in a warm metal bath, and then 50  $\mu\text{L}$  of HybriDetect assay buffer is pipetted and mixed to reach the required volume of lateral flow test strip. After 2-3 minutes, the results can be visible to the naked eye.

**Table S7 Results of qPCR for 74 clinical serum samples**

| qPCR test positive<br>sample no. | HBV viral load<br>(IU/mL) | qPCR test negative<br>sample no. | HBV viral load<br>(IU/mL) |
|----------------------------------|---------------------------|----------------------------------|---------------------------|
| 1                                | 2.33E+2                   | 1                                | <30                       |
| 2                                | 1.96E+6                   | 2                                | <30                       |
| 3                                | 5.42E+6                   | 3                                | <30                       |
| 4                                | 3.84E+4                   | 4                                | <30                       |
| 5                                | 3.61E+7                   | 5                                | <30                       |
| 6                                | 3.53E+4                   | 6                                | <30                       |
| 7                                | 5.36E+7                   | 7                                | <30                       |

|    |         |    |     |
|----|---------|----|-----|
| 8  | 4.42E+7 | 8  | <30 |
| 9  | 1.16E+2 | 9  | <30 |
| 10 | 1.40E+4 | 10 | <30 |
| 11 | 6.10E+6 | 11 | <30 |
| 12 | 9.85E+4 | 12 | <30 |
| 13 | 4.98E+6 | 13 | <30 |
| 14 | 3.46E+7 | 14 | <30 |
| 15 | 8.10E+5 | 15 | <30 |
| 16 | 2.71E+7 | 16 | <30 |
| 17 | 2.71E+3 | 17 | <30 |
| 18 | 4.08E+3 | 18 | <30 |
| 19 | 6.83E+3 | 19 | <30 |
| 20 | 1.06E+3 | 20 | <30 |
| 21 | 3.47E+2 | 21 | <30 |
| 22 | 4.79E+2 | 22 | <30 |
| 23 | 7.47E+2 | 23 | <30 |
| 24 | 2.04E+2 | 24 | <30 |
| 25 | 2.14E+2 | 25 | <30 |
| 26 | 6.80E+2 | 26 | <30 |
| 27 | 2.31E+4 | 27 | <30 |
| 28 | 8.63E+4 | 28 | <30 |
| 29 | 2.13E+3 | 29 | <30 |
| 30 | 7.17E+6 | 30 | <30 |
| 31 | 1.37E+2 | 31 | <30 |
| 32 | 2.23E+2 | 32 | <30 |
| □  | □       | 33 | <30 |
| □  | □       | 34 | <30 |
| □  | □       | 35 | <30 |
| □  | □       | 36 | <30 |
| □  | □       | 37 | <30 |
| □  | □       | 38 | <30 |
| □  | □       | 39 | <30 |
| □  | □       | 40 | <30 |
| □  | □       | 41 | <30 |
| □  | □       | 42 | <30 |

---
